# Supplementary material for: Multi-shaped strain soliton networks and moiré-potential-modulated band edge states in twisted bilayer SiC
Source: Royal Society of Chemistry journal article supplement (doi:10.1039/d1ra02139g), 2021-01-01
Supplement: d1ra02139g1.pdf [file d1ra02139g1.pdf]

## Supplementary materials for

# Multi-shaped strain soliton networks and moiré-potential-modulated band edge states in twisted bilayer SiC

Dawei Kang,<sup>\*,1</sup> Zheng-Wei Zuo,<sup>1</sup> Zhaowu Wang<sup>1,2</sup> and Weiwei Ju<sup>1</sup>

<sup>1</sup>*School of Physics and Engineering, Henan University of Science and Technology, Luoyang 471023, China*

<sup>2</sup>*National Laboratory of Solid State Microstructures, Nanjing University, Nanjing 210093, China*

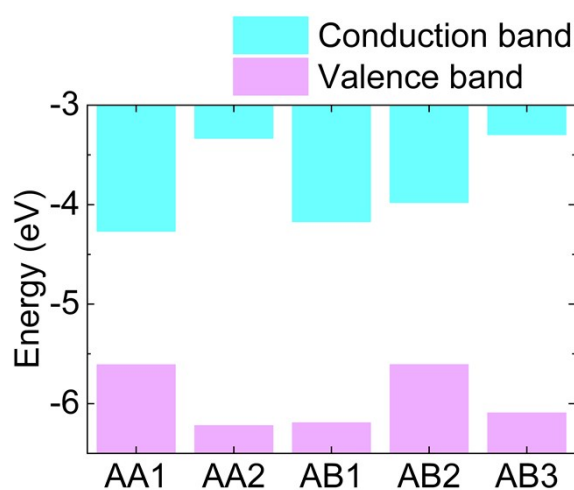

Fig.1. The band edge of bilayer SiC calculated by HSE functionals at high-symmetry stackings with rigid shift interlayer distance of 3.3 Å.

The stacking energies of bilayer SiC at high symmetry stackings are calculated as

$$E_{stack} = 2E_{monolayer} - E_{bilayer}$$

Table 1. The interlayer distance of bilayer SiC at high-symmetry stackings (HSS)

| HSS                     | AA1  | AA2  | AB1  | AB2  | AB3  |
|-------------------------|------|------|------|------|------|
| Interlayer distance (Å) | 3.77 | 2.21 | 3.24 | 3.65 | 3.15 |
| Total energy (eV)       | 1.33 | 0    | 0.90 | 1.31 | 0.67 |

\* kdwsdu@163.com

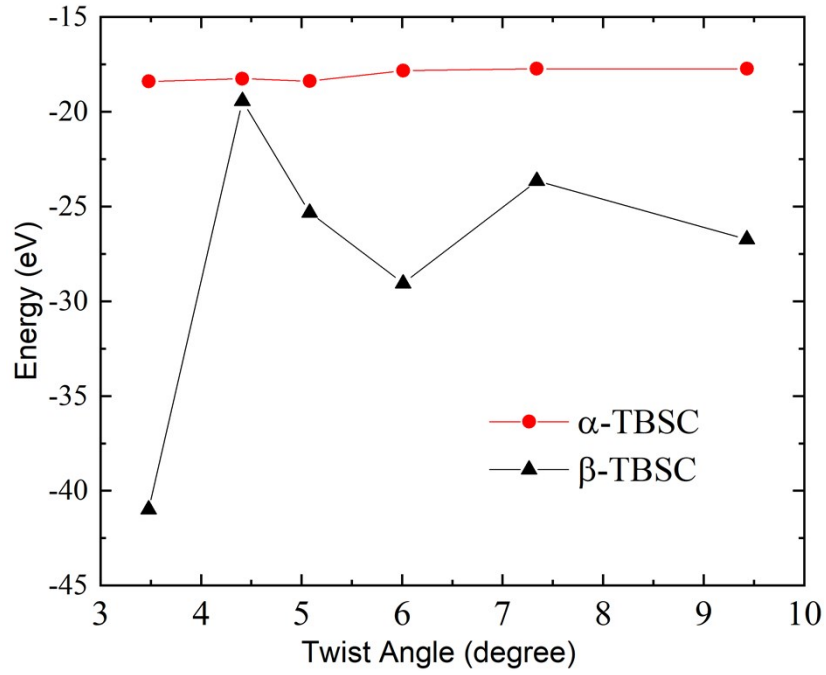

Fig. 2. The cohesive energy of TBSC as a function of twist angle.

Table 1. The (m,n) and number of atoms in TBSC studied in this work

| Twist Angle | (m,n)  | Number of atoms |
|-------------|--------|-----------------|
| 3.48        | (9,10) | 1084            |
| 4.41        | (7,8)  | 676             |
| 5.08        | (6,7)  | 508             |
| 6.01        | (5,6)  | 364             |
| 7.34        | (4,5)  | 244             |
| 9.43        | (3,4)  | 148             |
